# Supplementary material for: Assessment of indoor air quality in a primary school
Source: Springer Nature journal article supplement (doi:10.1007/s44274-025-00479-1), 2025-12-10
Supplement: MOESM1 [file 44274_2025_479_MOESM1_ESM.docx]

**Supplementary Information**

**Table S1 :Questionnaire on Indoor Air Quality**

| **Venue** | **Date Time** | | |
| --- | --- | --- | --- |
| **Number of teachers** |  | Number of students |  |
| **Number of other professionals** |  |  |  |
| **N.° Tables** |  | N.° Chairs |  |
| **Windows opened?** |  | For how long |  |
| **How many breaks do children have in a day?** |  |  |  |
| **Duration of the break** |  |  |  |
|  |  |  |  |
|  | **Chemical sheet** | | |
| **Classroom materials and furniture** | What kind of flooring material is used in the classroom? | |  |
|  | Are there carpets in the classroom? | |  |
|  | When was the classroom last decorated (e.g., painted, new flooring, etc.)? | |  |
|  | Are there pieces of furniture with upholstery in the classroom (e.g. sofas, chairs) | |  |
|  | Are there curtains in the classroom? | |  |
|  | air purifier | |  |
|  | air humidifier | |  |
|  | Printers | |  |
|  | | | |
| **Classroom use** | Do the children wear their outdoor shoes in the classroom? | |  |
|  | Is the classroom adjacent to the kitchen or cooking facilities? | |  |
|  | Are there any science or art classes that use solvents, paints or other chemical products? | |  |
|  | | | |
| **Cleaning** | What is the frequency at which the classroom is cleaned or maintained? | |  |
|  | What types of cleaning agents or detergents are used? | |  |
|  | Are there any artificial fragrances, such as air fresheners, that are used in the classroom? | |  |
|  | Are there cleaning materials available per area or classroom? | |  |
|  | | | |
| **Source of pollution from/around the school buildings** | Are there any major transportation routes, such as highways or airports, located near the school? | |  |
|  | Are there any power plants or manufacturing facilities located in the vicinity of the school? | |  |
|  | | | |
| **Air Quality** | Is there humidity and/or fungi dampness/mould in structural elements and/or furniture? | |  |
|  | Are the school buildings inspected once or twice each year for conditions that may lead to indoor air quality problems? | |  |

**Temperature**

Post hoc comparisons via Dunn's method with a Bonferroni correction for multiple tests as shown in Table S1 indicated that the median room temperature levels of the Kitchen were significantly higher than those of Year 5, *p* = .044; those of Year 3 were significantly greater than those of Year 5, *p* = .019; those of the Reception class were significantly greater than those of Year 5, *p* < .001; those of the Reception class were significantly greater than those of Year 2, p < .001; those of the Office class were significantly greater than those of Dining Hall, p < .001; those of the Office class were significantly greater than those of Dining Hall, p < .001; those of the Dining Hall class, p < .001; those of the Office class were significantly greater than those of Year 1, p < .001; those of Year 4, p = .006; those of the Office class were significantly greater than those of Year 4, p < .001; those of the Office class were significantly greater than those of Kitchen, p = .013; and those of the Office class were significantly greater than those of Year 3, p = .032. Only statistically significant results are reported.

**Table S2:Temperature Pairwise Comparisons between Locations**

| Sample 1- Sample 2 | Test Statistic | Std. Error | Std. Test Statistic | Sig. | Adj. Sig.a |
| --- | --- | --- | --- | --- | --- |
| Year 5-Year 2 | 23.292 | 28.31 | 0.82 | 0.411 | 1 |
| Year 5-Dining Hall | 31.156 | 28.31 | 1.10 | 0.271 | 1 |
| Year 5-Year 1 | 48.188 | 28.31 | 1.70 | 0.089 | 1 |
| Year 5-Year 4 | 54.396 | 28.31 | 1.92 | 0.055 | 1 |
| Year 5-Year 6 | 72.031 | 28.31 | 2.54 | 0.011 | 0.492 |
| Year 5-Kitchen | 93.302 | 28.31 | 3.30 | <.001 | 0.044 |
| Year 5-Year 3 | 99.979 | 28.31 | 3.53 | <.001 | 0.019 |
| Year 5-Reception Class | 162.354 | 28.31 | 5.74 | <.001 | 0 |
| Year 5-Office | 195.719 | 28.31 | 6.91 | <.001 | 0 |
| Year 2-Dining Hall | 7.865 | 28.31 | 0.28 | 0.781 | 1 |
| Year 2-Year 1 | 24.896 | 28.31 | 0.88 | 0.379 | 1 |
| Year 2-Year 4 | -31.104 | 28.31 | -1.10 | 0.272 | 1 |
| Year 2-Year 6 | 48.74 | 28.31 | 1.72 | 0.085 | 1 |
| Year 2-Kitchen | 70.01 | 28.31 | 2.47 | 0.013 | 0.603 |
| Year 2-Year 3 | -76.688 | 28.31 | -2.71 | 0.007 | 0.304 |
| Year 2-Reception Class | 139.063 | 28.31 | 4.91 | <.001 | 0 |
| Year 2-Office | 172.427 | 28.31 | 6.09 | <.001 | 0 |
| Dining Hall-Year 1 | -17.031 | 28.31 | -0.60 | 0.547 | 1 |
| Dining Hall-Year 4 | -23.24 | 28.31 | -0.82 | 0.412 | 1 |
| Dining Hall-Year 6 | 40.875 | 28.31 | 1.44 | 0.149 | 1 |
| Dining Hall-Kitchen | -62.146 | 28.31 | -2.20 | 0.028 | 1 |
| Dining Hall-Year 3 | -68.823 | 28.31 | -2.43 | 0.015 | 0.677 |
| Dining Hall-Reception Class | -131.198 | 28.31 | -4.64 | <.001 | 0 |
| Dining Hall-Office | 164.563 | 28.31 | 5.81 | <.001 | 0 |
| Year 1-Year 4 | -6.208 | 28.31 | -0.22 | 0.826 | 1 |
| Year 1-Year 6 | 23.844 | 28.31 | 0.84 | 0.4 | 1 |
| Year 1-Kitchen | 45.115 | 28.31 | 1.59 | 0.111 | 1 |
| Year 1-Year 3 | -51.792 | 28.31 | -1.83 | 0.067 | 1 |
| Year 1-Reception Class | 114.167 | 28.31 | 4.03 | <.001 | 0.002 |
| Year 1-Office | 147.531 | 28.31 | 5.21 | <.001 | 0 |
| Year 4-Year 6 | 17.635 | 28.31 | 0.62 | 0.533 | 1 |
| Year 4-Kitchen | 38.906 | 28.31 | 1.37 | 0.169 | 1 |
| Year 4-Year 3 | 45.583 | 28.31 | 1.61 | 0.107 | 1 |
| Year 4-Reception Class | 107.958 | 28.31 | 3.81 | <.001 | 0.006 |
| Year 4-Office | 141.323 | 28.31 | 4.99 | <.001 | 0 |
| Year 6-Kitchen | -21.271 | 28.31 | -0.75 | 0.452 | 1 |
| Year 6-Year 3 | -27.948 | 28.31 | -0.99 | 0.324 | 1 |
| Year 6-Reception Class | -90.323 | 28.31 | -3.19 | 0.001 | 0.064 |
| Year 6-Office | 123.688 | 28.31 | 4.37 | <.001 | 0.001 |
| Kitchen-Year 3 | -6.677 | 28.31 | -0.24 | 0.814 | 1 |
| Kitchen-Reception Class | -69.052 | 28.31 | -2.44 | 0.015 | 0.662 |
| Kitchen-Office | 102.417 | 28.31 | 3.62 | <.001 | 0.013 |
| Year 3-Reception Class | 62.375 | 28.31 | 2.20 | 0.028 | 1 |
| Year 3-Office | 95.74 | 28.31 | 3.38 | <.001 | 0.032 |
| Reception Class-Office | 33.365 | 28.31 | 1.18 | 0.239 | 1 |

Each row tests the null hypothesis that the Sample 1 and Sample 2 distributions are the same.

Asymptotic significances (2-sided tests) are displayed. The significance level is .050.

1. Significance values have been adjusted by the Bonferroni correction for multiple tests.

**Relative Humidity**

Post hoc comparisons via Dunn's method with a Bonferroni correction for multiple tests, as shown in Table S2 below, indicated that the median room relative humidity of Year 1 was significantly greater than that of the office, p = .036; that of Year 2 was significantly greater than that of the office, p = .011; that of the reception class was significantly greater than that of the office, p = .007; that of the hall class was significantly greater than that of the office, p < .001; that of Year 5 was significantly greater than that of the office, p < .001; that of Year 3 was significantly greater than that of the office, p < .001; that of Year 3 was significantly greater than that of Year 6, p = .023; that of Year 5 was significantly greater than that of Year 6, p = .004; and that of Year 4 was significantly greater than that of the Kitchen, p = .044. Only statistically significant results are reported.

Table S3: Relative Humidity Pairwise Comparisons between Locations

| Sample 1- Sample 2 | Test Statistic | Std. Error | Std. Test Statistic | Sig. | Adj. Sig.a |
| --- | --- | --- | --- | --- | --- |
| Office-Year 6 | -58.313 | 28.312 | -2.06 | 0.039 | 1 |
| Office-Kitchen | -82.896 | 28.312 | -2.928 | 0.003 | 0.154 |
| Office-Year 1 | -94.885 | 28.312 | -3.351 | <.001 | 0.036 |
| Office-Year 2 | -103.854 | 28.312 | -3.668 | <.001 | 0.011 |
| Office-Reception Class | -106.729 | 28.312 | -3.77 | <.001 | 0.007 |
| Office-Dinning Hall | -124.063 | 28.312 | -4.382 | <.001 | 0.001 |
| Office-Year 3 | -156.677 | 28.312 | -5.534 | <.001 | 0 |
| Office-Year 5 | -169.677 | 28.312 | -5.993 | <.001 | 0 |
| Office-Year 4 | -176.24 | 28.312 | -6.225 | <.001 | 0 |
| Year 6-Kitchen | -24.583 | 28.312 | -0.868 | 0.385 | 1 |
| Year 6-Year 1 | -36.573 | 28.312 | -1.292 | 0.196 | 1 |
| Year 6-Year 2 | -45.542 | 28.312 | -1.609 | 0.108 | 1 |
| Year 6-Reception Class | -48.417 | 28.312 | -1.71 | 0.087 | 1 |
| Year 6-Dinning Hall | -65.75 | 28.312 | -2.322 | 0.02 | 0.91 |
| Year 6-Year 3 | -98.365 | 28.312 | -3.474 | <.001 | 0.023 |
| Year 6-Year 5 | -111.365 | 28.312 | -3.933 | <.001 | 0.004 |
| Year 6-Year 4 | -117.927 | 28.312 | -4.165 | <.001 | 0.001 |
| Kitchen-Year 1 | -11.99 | 28.312 | -0.423 | 0.672 | 1 |
| Kitchen-Year 2 | -20.958 | 28.312 | -0.74 | 0.459 | 1 |
| Kitchen-Reception Class | -23.833 | 28.312 | -0.842 | 0.4 | 1 |
| Kitchen-Dinning Hall | 41.167 | 28.312 | 1.454 | 0.146 | 1 |
| Kitchen-Year 3 | -73.781 | 28.312 | -2.606 | 0.009 | 0.412 |
| Kitchen-Year 5 | -86.781 | 28.312 | -3.065 | 0.002 | 0.098 |
| Kitchen-Year 4 | -93.344 | 28.312 | -3.297 | <.001 | 0.044 |
| Year 1-Year 2 | -8.969 | 28.312 | -0.317 | 0.751 | 1 |
| Year 1-Reception Class | 11.844 | 28.312 | 0.418 | 0.676 | 1 |
| Year 1-Dinning Hall | 29.177 | 28.312 | 1.031 | 0.303 | 1 |
| Year 1-Year 3 | -61.792 | 28.312 | -2.183 | 0.029 | 1 |
| Year 1-Year 5 | -74.792 | 28.312 | -2.642 | 0.008 | 0.371 |
| Year 1-Year 4 | -81.354 | 28.312 | -2.874 | 0.004 | 0.183 |
| Year 2-Reception Class | 2.875 | 28.312 | 0.102 | 0.919 | 1 |
| Year 2-Dinning Hall | 20.208 | 28.312 | 0.714 | 0.475 | 1 |
| Year 2-Year 3 | -52.823 | 28.312 | -1.866 | 0.062 | 1 |
| Year 2-Year 5 | -65.823 | 28.312 | -2.325 | 0.02 | 0.903 |
| Year 2-Year 4 | -72.385 | 28.312 | -2.557 | 0.011 | 0.475 |
| Reception Class-Dinning Hall | 17.333 | 28.312 | 0.612 | 0.54 | 1 |
| Reception Class-Year 3 | -49.948 | 28.312 | -1.764 | 0.078 | 1 |
| Reception Class-Year 5 | -62.948 | 28.312 | -2.223 | 0.026 | 1 |
| Reception Class-Year 4 | -69.51 | 28.312 | -2.455 | 0.014 | 0.634 |
| Dining Hall-Year 3 | -32.615 | 28.312 | -1.152 | 0.249 | 1 |
| Dining Hall-Year 5 | -45.615 | 28.312 | -1.611 | 0.107 | 1 |
| Dining Hall-Year 4 | -52.177 | 28.312 | -1.843 | 0.065 | 1 |
| Year 3-Year 5 | -13 | 28.312 | -0.459 | 0.646 | 1 |
| Year 3-Year 4 | -19.563 | 28.312 | -0.691 | 0.49 | 1 |
| Year 5-Year 4 | 6.563 | 28.312 | 0.232 | 0.817 | 1 |

Each row tests the null hypothesis that the Sample 1 and Sample 2 distributions are the same.

Asymptotic significances (2-sided tests) are displayed. The significance level is .050.

1. Significance values have been adjusted by the Bonferroni correction for multiple tests.

**Total Volatile Organic Compounds**

Post hoc comparisons via Dunn's method with a Bonferroni correction for multiple tests as shown in Table S3 below, indicated that the median room total volatile organic compounds (TVOCs) of Year 1 were significantly greater than those of Kitchen, p = .043; Reception was significantly greater than that of Kitchen, p = .032; hall significantly greater than Kitchen, p = .023; office significantly greater than Kitchen, p < .001; Year 2 class significantly greater than Kitchen, p < .001; Year 5 significantly greater than Kitchen, p < .001; Year 4 significantly greater than Kitchen, p < .001; Year 6 significantly greater than Kitchen, p < .001; Year 6 significantly greater than Kitchen, p < .001; Year 3 significantly greater than Kitchen, p = .001; Year 5 significantly greater than Year 1, p = .018; Year 4 significantly greater than Year 1, p = .006; Year 6 significantly greater than Year 1, p = .003; Year 3 significantly greater than Year 1, p = .001; Year 5 significantly greater than Reception, p = .024; Year 4 significantly greater than Reception, p = .008; and Year 6 significantly greater than Reception, p = .004. Only statistically significant results are reported.

Table S4: Total Volatile Organic Compounds Pairwise Comparisons between Location

| Sample 1- Sample 2 | Test Statistic | | | Std. Error | | Std. Test Statistic | | Sig. | | Adj. Sig.a | |
| --- | --- | --- | --- | --- | --- | --- | --- | --- | --- | --- | --- |
| Kitchen-Year 1 | | -93.542 | 28.31 | | -3.30 | | <.001 | | 0.043 | |
| Kitchen-Reception Class | | -95.896 | 28.31 | | -3.39 | | <.001 | | 0.032 | |
| Kitchen-Dinning Hall | | 98.396 | 28.31 | | 3.48 | | <.001 | | 0.023 | |
| Kitchen-Office | | 126.469 | 28.31 | | 4.47 | | <.001 | | 0 | |
| Kitchen-Year 2 | | -127.813 | 28.31 | | -4.51 | | <.001 | | 0 | |
| Kitchen-Year 5 | | -193.927 | 28.31 | | -6.85 | | <.001 | | 0 | |
| Kitchen-Year 4 | | -201.896 | 28.31 | | -7.13 | | <.001 | | 0 | |
| Kitchen-Year 6 | | 207.188 | 28.31 | | 7.32 | | <.001 | | 0 | |
| Kitchen-Year 3 | | -216.229 | 28.31 | | -7.64 | | <.001 | | 0 | |
| Year 1-Reception Class | | 2.354 | 28.31 | | 0.08 | | 0.934 | | 1 | |
| Year 1-Dinning Hall | | 4.854 | 28.31 | | 0.17 | | 0.864 | | 1 | |
| Year 1-Office | | 32.927 | 28.31 | | 1.16 | | 0.245 | | 1 | |
| Year 1-Year 2 | | -34.271 | 28.31 | | -1.21 | | 0.226 | | 1 | |
| Year 1-Year 5 | | -100.385 | 28.31 | | -3.55 | | <.001 | | 0.018 | |
| Year 1-Year 4 | | -108.354 | 28.31 | | -3.83 | | <.001 | | 0.006 | |
| Year 1-Year 6 | | 113.646 | 28.31 | | 4.01 | | <.001 | | 0.003 | |
| Year 1-Year 3 | | -122.688 | 28.31 | | -4.33 | | <.001 | | 0.001 | |
| Reception Class-Dinning Hall | | 2.5 | 28.31 | | 0.09 | | 0.93 | | 1 | |
| Reception Class-Office | | 30.573 | 28.31 | | 1.08 | | 0.28 | | 1 | |
| Reception Class-Year 2 | | -31.917 | 28.31 | | -1.13 | | 0.26 | | 1 | |
| Reception Class-Year 5 | | -98.031 | 28.31 | | -3.46 | | <.001 | | 0.024 | |
| Reception Class-Year 4 | | -106 | 28.31 | | -3.74 | | <.001 | | 0.008 | |
| Reception Class-Year 6 | | 111.292 | 28.31 | | 3.93 | | <.001 | | 0.004 | |
| Reception Class-Year 3 | | -120.333 | 28.31 | | -4.25 | | <.001 | | 0.001 | |
| Dining Hall-Office | | 28.073 | 28.31 | | 0.99 | | 0.321 | | 1 | |
| Dining Hall-Year 2 | | -29.417 | 28.31 | | -1.04 | | 0.299 | | 1 | |
| Dining Hall-Year 5 | | -95.531 | 28.31 | | -3.37 | | <.001 | | 0.033 | |
| Dining Hall-Year 4 | | -103.5 | 28.31 | | -3.66 | | <.001 | | 0.012 | |
| Dining Hall-Year 6 | | 108.792 | 28.31 | | 3.84 | | <.001 | | 0.005 | |
| Dining Hall-Year 3 | | -117.833 | 28.31 | | -4.16 | | <.001 | | 0.001 | |
| Office-Year 2 | | -1.344 | 28.31 | | -0.05 | | 0.962 | | 1 | |
| Office-Year 5 | | -67.458 | 28.31 | | -2.38 | | 0.017 | | 0.774 | |
| Office-Year 4 | | -75.427 | 28.31 | | -2.66 | | 0.008 | | 0.348 | |
| Office-Year 6 | | -80.719 | 28.31 | | -2.85 | | 0.004 | | 0.196 | |
| Office-Year 3 | | -89.76 | 28.31 | | -3.17 | | 0.002 | | 0.069 | |
| Year 2-Year 5 | | -66.115 | 28.31 | | -2.34 | | 0.02 | | 0.879 | |
| Year 2-Year 4 | | -74.083 | 28.31 | | -2.62 | | 0.009 | | 0.4 | |
| Year 2-Year 6 | | 79.375 | 28.31 | | 2.80 | | 0.005 | | 0.228 | |
| Year 2-Year 3 | | -88.417 | 28.31 | | -3.12 | | 0.002 | | 0.081 | |
| Year 5-Year 4 | | 7.969 | 28.31 | | 0.28 | | 0.778 | | 1 | |
| Year 5-Year 6 | | 13.26 | 28.31 | | 0.47 | | 0.64 | | 1 | |
| Year 5-Year 3 | | 22.302 | 28.31 | | 0.79 | | 0.431 | | 1 | |
| Year 4-Year 6 | | 5.292 | 28.31 | | 0.19 | | 0.852 | | 1 | |
| Year 4-Year 3 | | 14.333 | 28.31 | | 0.51 | | 0.613 | | 1 | |
| Year 6-Year 3 | | -9.042 | 28.31 | | -0.32 | | 0.749 | | 1 | |

Each row tests the null hypothesis that the Sample 1 and Sample 2 distributions are the same.

Asymptotic significances (2-sided tests) are displayed. The significance level is .050.

1. Significance values have been adjusted by the Bonferroni correction for multiple tests.

**Carbon dioxide**

Post hoc comparisons via Dunn’s method with a Bonferroni correction for multiple tests as shown in Table S4, indicated that the median room carbon dioxide (CO2) concentration of Year 3 was significantly greater than that of the Kitchen, p = .009; that of the office was significantly greater than that of the Kitchen, p < .001; that of the office was significantly greater than that of Year 5, p = .001; that of Year 6, p = .010; and that of the office was significantly greater than that of the Reception, p = .023. Only statistically significant results are reported.

Table S5:Carbon Dioxide Pairwise Comparisons between Location

| Sample 1- Sample 2 | Test Statistic | Std. Error | Std. Test Statistic | Sig. | Adj. Sig.a |
| --- | --- | --- | --- | --- | --- |
| Kitchen-Year 5 | -31.417 | 28.31 | -1.11 | 0.267 | 1 |
| Kitchen-Year 6 | 49.406 | 28.31 | 1.75 | 0.081 | 1 |
| Kitchen-Reception Class | -55.292 | 28.31 | -1.95 | 0.051 | 1 |
| Kitchen-Year 2 | -64.594 | 28.31 | -2.28 | 0.023 | 1 |
| Kitchen-Year 4 | -65.021 | 28.31 | -2.30 | 0.022 | 0.974 |
| Kitchen-Dinning Hall | 72.917 | 28.31 | 2.58 | 0.01 | 0.451 |
| Kitchen-Year 1 | -86.917 | 28.31 | -3.07 | 0.002 | 0.096 |
| Kitchen-Year 3 | -105.625 | 28.31 | -3.73 | <.001 | 0.009 |
| Kitchen-Office | 153.708 | 28.31 | 5.43 | <.001 | 0 |
| Year 5-Year 6 | 17.99 | 28.31 | 0.64 | 0.525 | 1 |
| Year 5-Reception Class | 23.875 | 28.31 | 0.84 | 0.399 | 1 |
| Year 5-Year 2 | 33.177 | 28.31 | 1.17 | 0.241 | 1 |
| Year 5-Year 4 | 33.604 | 28.31 | 1.19 | 0.235 | 1 |
| Year 5-Dinning Hall | 41.5 | 28.31 | 1.47 | 0.143 | 1 |
| Year 5-Year 1 | 55.5 | 28.31 | 1.96 | 0.05 | 1 |
| Year 5-Year 3 | 74.208 | 28.31 | 2.62 | 0.009 | 0.395 |
| Year 5-Office | 122.292 | 28.31 | 4.32 | <.001 | 0.001 |
| Year 6-Reception Class | -5.885 | 28.31 | -0.21 | 0.835 | 1 |
| Year 6-Year 2 | -15.188 | 28.31 | -0.54 | 0.592 | 1 |
| Year 6-Year 4 | -15.615 | 28.31 | -0.55 | 0.581 | 1 |
| Year 6-Dinning Hall | -23.51 | 28.31 | -0.83 | 0.406 | 1 |
| Year 6-Year 1 | -37.51 | 28.31 | -1.33 | 0.185 | 1 |
| Year 6-Year 3 | -56.219 | 28.31 | -1.99 | 0.047 | 1 |
| Year 6-Office | 104.302 | 28.31 | 3.68 | <.001 | 0.01 |
| Reception Class-Year 2 | -9.302 | 28.31 | -0.33 | 0.743 | 1 |
| Reception Class-Year 4 | -9.729 | 28.31 | -0.34 | 0.731 | 1 |
| Reception Class-Dinning Hall | 17.625 | 28.31 | 0.62 | 0.534 | 1 |
| Reception Class-Year 1 | -31.625 | 28.31 | -1.12 | 0.264 | 1 |
| Reception Class-Year 3 | -50.333 | 28.31 | -1.78 | 0.075 | 1 |
| Reception Class-Office | 98.417 | 28.31 | 3.48 | <.001 | 0.023 |
| Year 2-Year 4 | -0.427 | 28.31 | -0.02 | 0.988 | 1 |
| Year 2-Dinning Hall | 8.323 | 28.31 | 0.29 | 0.769 | 1 |
| Year 2-Year 1 | 22.323 | 28.31 | 0.79 | 0.43 | 1 |
| Year 2-Year 3 | -41.031 | 28.31 | -1.45 | 0.147 | 1 |
| Year 2-Office | 89.115 | 28.31 | 3.15 | 0.002 | 0.074 |
| Year 4-Dinning Hall | 7.896 | 28.31 | 0.28 | 0.78 | 1 |
| Year 4-Year 1 | 21.896 | 28.31 | 0.77 | 0.439 | 1 |
| Year 4-Year 3 | 40.604 | 28.31 | 1.43 | 0.152 | 1 |
| Year 4-Office | 88.688 | 28.31 | 3.13 | 0.002 | 0.078 |
| Dining Hall-Year 1 | -14 | 28.31 | -0.49 | 0.621 | 1 |
| Dining Hall-Year 3 | -32.708 | 28.31 | -1.16 | 0.248 | 1 |
| Dining Hall-Office | 80.792 | 28.31 | 2.85 | 0.004 | 0.195 |
| Year 1-Year 3 | -18.708 | 28.31 | -0.66 | 0.509 | 1 |
| Year 1-Office | 66.792 | 28.31 | 2.36 | 0.018 | 0.825 |
| Year 3-Office | 48.083 | 28.31 | 1.70 | 0.089 | 1 |

Each row tests the null hypothesis that the Sample 1 and Sample 2 distributions are the same.

Asymptotic significances (2-sided tests) are displayed. The significance level is .050.

1. Significance values have been adjusted by the Bonferroni correction for multiple tests.

**Carbon monoxide**

Post hoc comparisons via Dunn's method with a Bonferroni correction for multiple tests as shown in Table S5 indicated that the median room carbon monoxide (CO) of Year 3 was significantly greater than that of the office, p = .001; that of the kitchen was significantly greater than that of the office, p < .001; that of year four was significantly greater than that of the office, p < .001; that of year 3 was significantly greater than that of year 1, p = .005; that of year six was significantly greater than that of year 1, p = .003; that of year 4 was significantly greater than that of year 1, p < .001; that of year 4 was significantly greater than that of year 2, p < .001; that of year 4 was significantly greater than that of the hall, p = .023; that of year four was significantly greater than that of the reception class, p = .009; that of year six was significantly greater than that of the reception class, p = .007; and that of year 4 was significantly greater than that of the reception class, p < .001. Only statistically significant results are reported.

Table S6:Carbon monoxide Pairwise Comparisons between Location

| Sample 1- Sample 2 | Test Statistic | Std. Error | Std. Test Statistic | Sig. | Adj. Sig.a |
| --- | --- | --- | --- | --- | --- |
| Office-Year 1 | -17.26 | 26.93 | -0.64 | 0.522 | 1 |
| Office-Reception Class | -21.688 | 26.93 | -0.81 | 0.421 | 1 |
| Office-Year 2 | -43.969 | 26.93 | -1.63 | 0.103 | 1 |
| Office-Dinning Hall | -77.365 | 26.93 | -2.87 | 0.004 | 0.183 |
| Office-Year 5 | -83.042 | 26.93 | -3.08 | 0.002 | 0.092 |
| Office-Year 3 | -115.271 | 26.93 | -4.28 | <.001 | 0.001 |
| Office-Kitchen | -121.99 | 26.93 | -4.53 | <.001 | 0 |
| Office-Year 6 | -123.917 | 26.93 | -4.60 | <.001 | 0 |
| Office-Year 4 | -172.688 | 26.93 | -6.41 | <.001 | 0 |
| Year 1-Reception Class | 4.427 | 26.93 | 0.16 | 0.869 | 1 |
| Year 1-Year 2 | -26.708 | 26.93 | -0.99 | 0.321 | 1 |
| Year 1-Dinning Hall | 60.104 | 26.93 | 2.23 | 0.026 | 1 |
| Year 1-Year 5 | -65.781 | 26.93 | -2.44 | 0.015 | 0.656 |
| Year 1-Year 3 | -98.01 | 26.93 | -3.64 | <.001 | 0.012 |
| Year 1-Kitchen | 104.729 | 26.93 | 3.89 | <.001 | 0.005 |
| Year 1-Year 6 | 106.656 | 26.93 | 3.96 | <.001 | 0.003 |
| Year 1-Year 4 | -155.427 | 26.93 | -5.77 | <.001 | 0 |
| Reception Class-Year 2 | -22.281 | 26.93 | -0.83 | 0.408 | 1 |
| Reception Class-Dinning Hall | 55.677 | 26.93 | 2.07 | 0.039 | 1 |
| Reception Class-Year 5 | -61.354 | 26.93 | -2.28 | 0.023 | 1 |
| Reception Class-Year 3 | -93.583 | 26.93 | -3.48 | <.001 | 0.023 |
| Reception Class-Kitchen | 100.302 | 26.93 | 3.73 | <.001 | 0.009 |
| Reception Class-Year 6 | 102.229 | 26.93 | 3.80 | <.001 | 0.007 |
| Reception Class-Year 4 | -151 | 26.93 | -5.61 | <.001 | 0 |
| Year 2-Dinning Hall | 33.396 | 26.93 | 1.24 | 0.215 | 1 |
| Year 2-Year 5 | -39.073 | 26.93 | -1.45 | 0.147 | 1 |
| Year 2-Year 3 | -71.302 | 26.93 | -2.65 | 0.008 | 0.365 |
| Year 2-Kitchen | 78.021 | 26.93 | 2.90 | 0.004 | 0.169 |
| Year 2-Year 6 | 79.948 | 26.93 | 2.97 | 0.003 | 0.134 |
| Year 2-Year 4 | -128.719 | 26.93 | -4.78 | <.001 | 0 |
| Dining Hall-Year 5 | -5.677 | 26.93 | -0.21 | 0.833 | 1 |
| Dining Hall-Year 3 | -37.906 | 26.93 | -1.41 | 0.159 | 1 |
| Dining Hall-Kitchen | -44.625 | 26.93 | -1.66 | 0.097 | 1 |
| Dining Hall-Year 6 | 46.552 | 26.93 | 1.73 | 0.084 | 1 |
| Dining Hall-Year 4 | -95.323 | 26.93 | -3.54 | <.001 | 0.018 |
| Year 5-Year 3 | 32.229 | 26.93 | 1.20 | 0.231 | 1 |
| Year 5-Kitchen | 38.948 | 26.93 | 1.45 | 0.148 | 1 |
| Year 5-Year 6 | 40.875 | 26.93 | 1.52 | 0.129 | 1 |
| Year 5-Year 4 | 89.646 | 26.93 | 3.33 | <.001 | 0.039 |
| Year 3-Kitchen | 6.719 | 26.93 | 0.25 | 0.803 | 1 |
| Year 3-Year 6 | 8.646 | 26.93 | 0.32 | 0.748 | 1 |
| Year 3-Year 4 | -57.417 | 26.93 | -2.13 | 0.033 | 1 |
| Kitchen-Year 6 | 1.927 | 26.93 | 0.07 | 0.943 | 1 |
| Kitchen-Year 4 | -50.698 | 26.93 | -1.88 | 0.06 | 1 |
| Year 6-Year 4 | -48.771 | 26.93 | -1.81 | 0.07 | 1 |

Each row tests the null hypothesis that the Sample 1 and Sample 2 distributions are the same.

Asymptotic significances (2-sided tests) are displayed. The significance level is .050.

1. Significance values have been adjusted by the Bonferroni correction for multiple tests.

**PM2.5 concentration**

Post hoc comparisons via Dunn’s method with a Bonferroni correction for multiple tests as shown in Table S6 below, indicated that the median room particulate matter (PM2.5) of year 6 was significantly greater than that of the kitchen *p* = .020; that of year 5 was significantly greater than that of the kitchen, *p* = .007; that of year 3 was significantly greater than that of the kitchen, *p* = .003; that of year 5 was significantly greater than that of the dining hall, *p* = .023; that of year 3 was significantly greater than that of the dining hall, *p* = .010; that of year 6 was significantly greater than that of the dining hall, *p* = .003; that of year 5 was significantly greater than that of the reception class, *p* = .031; that of year 3 was significantly greater than that of the reception class, *p* = .014; that of year 6 was significantly greater than that of the reception class, *p* = .003; that of year 6 was significantly greater than that of year 4, *p* = .013 and that of year 6 was significantly greater than that of year 1, *p* = .048. Only statistically significant results are reported.

Table S7: PM 2.5 Pairwise Comparisons between Location

| Sample 1- Sample 2 | Test Statistic | Std. Error | Std. Test Statistic | Sig. | Adj. Sig.a |
| --- | --- | --- | --- | --- | --- |
| Kitchen – Dining Hall | 11.438 | 28.07 | .408 | .684 | 1 |
| Kitchen – Reception Class | -14.656 | 28.07 | -.52 | .602 | 1 |
| Kitchen – Year 4 | -28.969 | 28.07 | -1.03 | .302 | 1 |
| Kitchen – Year 1 | -43.292 | 28.07 | -1.54 | .123 | 1 |
| Kitchen – Year 2 | -46.042 | 28.07 | -1.64 | .101 | 1 |
| Kitchen – Office | 53.104 | 28.07 | 1.89 | .058 | 1 |
| Kitchen – Year 5 | -75.323 | 28.07 | -2.68 | .007 | .328 |
| Kitchen – Year 3 | -83.531 | 28.07 | -2.98 | .003 | .131 |
| Kitchen – Year 6 | 98.750 | 28.07 | 3.52 | <.001 | .020 |
| Dining Hall – Reception Class | -3.219 | 28.07 | -.12 | .909 | 1 |
| Dining Hall – Year 4 | -17.531 | 28.07 | -.625 | .532 | 1 |
| Dining Hall – Year 1 | -31.854 | 28.07 | -1.135 | .256 | 1 |
| Dining Hall – Year 2 | -34.604 | 28.07 | -1.233 | .218 | 1 |
| Dining Hall – Office | 41.667 | 28.07 | 1.485 | .138 | 1 |
| Dining Hall – Year 5 | -63.885 | 28.07 | -2.276 | .023 | 1 |
| Dining Hall – Year 3 | -72.094 | 28.07 | -2.569 | .010 | 1 |
| Dining Hall – Year 6 | 87.313 | 28.07 | 3.111 | .002 | .084 |
| Reception Class – Year 4 | -14.313 | 28.07 | -.510 | .610 | 1 |
| Reception Class – Year 1 | -28.635 | 28.07 | -1.020 | .308 | 1 |
| Reception Class – Year 2 | -31.385 | 28.07 | -1.118 | .263 | 1 |
| Reception Class – Office | 38.448 | 28.07 | 1.370 | .171 | 1 |
| Reception Class – Year 5 | -60.667 | 28.07 | -2.162 | .031 | 1 |
| Reception Class – Year 3 | -68.875 | 28.07 | -2.454 | .014 | .636 |
| Reception Class – Year 6 | 84.094 | 28.07 | 2.996 | .003 | .123 |
| Year 4 – Year 1 | 14.323 | 28.07 | .510 | .610 | 1 |
| Year 4 – Year 2 | 17.073 | 28.07 | .608 | .543 | 1 |
| Year 4 – Office | 24.135 | 28.07 | .860 | .390 | 1 |
| Year 4 – Year 5 | -46.354 | 28.07 | -1.652 | .099 | 1 |
| Year 4 – Year 3 | 54.563 | 28.07 | 1.944 | .052 | 1 |
| Year 4 – Year 6 | 69.781 | 28.07 | 2.486 | .013 | .581 |
| Year 1 – Year 2 | -2.750 | 28.07 | -.098 | .922 | 1 |
| Year 1 – Office | 9.813 | 28.07 | .350 | .727 | 1 |
| Year 1 – Year 5 | -32.031 | 28.07 | -1.141 | .254 | 1 |
| Year 1 – Year 3 | -40.240 | 28.07 | -1.434 | .152 | 1 |
| Year 1 – Year 6 | 55.458 | 28.07 | 1.976 | .048 | 1 |
| Year 2 - Office | 7.063 | 28.07 | .252 | .801 | 1 |
| Year 2 – Year 5 | -29.281 | 28.07 | -1.043 | .297 | 1 |
| Year 2 – Year 3 | -37.490 | 28.07 | -1.336 | .182 | 1 |
| Year 2 – Year 6 | 52.708 | 28.07 | 1.878 | .060 | 1 |
| Office – Year 5 | -22.219 | 28.07 | -.792 | .429 | 1 |
| Office – Year 3 | -30.427 | 28.07 | -1.084 | .278 | 1 |
| Office – Year 6 | -45.646 | 28.07 | -1.626 | .104 | 1 |
| Year 5 – Year 3 | 8.208 | 28.07 | .292 | .770 | 1 |
| Year 5 – Year 6 | 23.427 | 28.07 | .835 | .404 | 1 |
| Year 3 – Year 6 | 15.219 | 28.07 | .542 | .588 | 1 |

Each row tests the null hypothesis that the Sample 1 and Sample 2 distributions are the same.

Asymptotic significances (2-sided tests) are displayed. The significance level is .050.

1. Significance values have been adjusted by the Bonferroni correction for multiple tests.

**PM10 concentration**

Post hoc comparisons via Dunn’s method with a Bonferroni correction for multiple tests as shown in Table S7, indicated that the median room particulate matter (PM10) of year 6 was significantly greater than that of Year 2, p = .005; that of the reception class was significantly greater than that of Year 2, *p* < .001; that of year 4 was significantly greater than that of Year 2, p < .001; that of year 5 class was significantly greater than that of year 2, p < .001; that of year 6 was significantly greater than that of Year 1, *p* = .033; that of reception was significantly greater than that of Year 1, *p* = .005; that of year 4 was significantly greater than that of Year 1, *p* = .002; that of year 5 was significantly greater than that of Year 1, *p* <..001; that of reception was significantly greater than that of Year 3, *p* = .009; that of year 6 was significantly greater than that of Year 1, *p* = .033 ; that of year 4 was significantly greater than that of Year 3, *p* = .004 ; that of year 5 was significantly greater than that of Year 3, *p* = .001; that of year 6 was significantly greater than that of Year 1, *p* = .033 ; that of year 4 was significantly greater than that of the kitchen, *p* = .048; that of year 5 was significantly greater than that of the kitchen, *p* = .023 and that of year 5 was significantly greater than that of the office, p = .028. Only statistically significant results are reported.

Table S8:PM10 Pairwise Comparisons of Location

| Sample 1- Sample 2 | Test Statistic | Std. Error | Std. Test Statistic | Sig. | Adj. Sig.a |
| --- | --- | --- | --- | --- | --- |
| Year 2-Year 1 | 19.573 | 28.14 | .696 | .487 | 1 |
| Year 2-Year 3 | -25.854 | 28.14 | -.919 | .359 | 1 |
| Year 2-Kitchen | 51.438 | 28.14 | 1.828 | .068 | 1 |
| Year 2-Year 6 | 79.615 | 28.14 | 2.829 | .005 | .210 |
| Year 2- Reception Class | 28.14 | 28.14 | 3.535 | <.001 | .018 |
| Year 2-Year 4 | -107.083 | 28.14 | -3.805 | <.001 | .006 |
| Year 2-Year 5 | -115.219 | 28.14 | -4.095 | <.001 | .002 |
| Year 1 – Year 3 | -6.281 | 28.14 | -.223 | .823 | 1 |
| Year 1 – Kitchen | 31.865 | 28.14 | 1.132 | .823 | 1 |
| Year 1 – Office | 33.869 | 28.14 | 1.205 | .228 | 1 |
| Year 1 – Dining Hall | 37.146 | 28.14 | 1.320 | .187 | 1 |
| Year 1 – Year 6 | 60.042 | 28.14 | 2.134 | .033 | 1 |
| Year 1 – Reception Class | 79.896 | 28.14 | 2.839 | .005 | .203 |
| Year 1 – Year 4 | -87.510 | 28.14 | -3.110 | .002 | .084 |
| Year 1 – Year 5 | -95.646 | 28.14 | -3.399 | <.001 | .030 |
| Year 3 – Kitchen | 25.583 | 28.14 | .909 | .363 | 1 |
| Year 3 – Office | 27.615 | 28.14 | .981 | .363 | 1 |
| Year 3- Dining Hall | 30.865 | 28.14 | 1.097 | .273 | 1 |
| Year 3- Year 6 | 53.760 | 28.14 | 1.911 | .056 | 1 |
| Year 3- Reception Class | 73.615 | 28.14 | 2.616 | .009 | .400 |
| Year 3-Year 4 | -81.229 | 28.14 | -2.887 | .004 | .175 |
| Year 3-Year 5 | -89.365 | 28.14 | -3.176 | .001 | .067 |
| Kitchen – Office | 2.031 | 28.14 | .072 | .942 | 1 |
| Kitchen – Dining Hall | 5.281 | 28.14 | .188 | .851 | 1 |
| Kitchen- Year 6 | 28.177 | 28.14 | 1.001 | .317 | 1 |
| Kitchen- Reception Class | -48.031 | 28.14 | -1.707 | .088 | 1 |
| Kitchen-Year 4 | -55.646 | 28.14 | -1.978 | .048 | 1 |
| Kitchen-Year 5 | -63.781 | 28.14 | -2.267 | .023 | 1 |
| Office – Dining Hall | -3.250 | 28.14 | -.115 | .908 | 1 |
| Office – Year 6 | -26.146 | 28.14 | -.929 | .353 | 1 |
| Office – Reception Class | -46.000 | 28.14 | -1.635 | .102 | 1 |
| Office – Year 4 | -53.615 | 28.14 | -1.905 | .057 | 1 |
| Office – Year 5 | -61.750 | 28.14 | -2.194 | .028 | 1 |
| Dining Hall – Year 6 | 22.896 | 28.14 | .814 | .416 | 1 |
| Dining Hall – Reception Class | -42.750 | 28.14 | -1.519 | .129 | 1 |
| Dining Hall – Year 4 | -50.365 | 28.14 | -1.790 | .073 | 1 |
| Dining Hall – Year 5 | -58.500 | 28.14 | -2.079 | .038 | 1 |
| Year 6 – Reception Class | -19.854 | 28.14 | -.706 | .480 | 1 |
| Year 6 – Year 4 | -27.469 | 28.14 | -.976 | .329 | 1 |
| Year 6 – Year 5 | -35.604 | 28.14 | -1.265 | .206 | 1 |
| Reception Class – Year 4 | -7.615 | 28.14 | -.271 | .787 | 1 |
| Reception Class Year 5 | -15.750 | 28.14 | -.560 | .576 | 1 |
| Year 4 – Year 5 | -8.135 | 28.14 | -.289 | .772 | 1 |

Each row tests the null hypothesis that the Sample 1 and Sample 2 distributions are the same.

Asymptotic significances (2-sided tests) are displayed. The significance level is .050.

1. Significance values have been adjusted by the Bonferroni correction for multiple tests.

**Formaldehyde**

Post hoc comparisons via Dunn's method with a Bonferroni correction for multiple tests as shown in Table S8 indicated that the median formaldehyde concentrations (ppb) of Year 5 were significantly greater than those of Year 2, p = .008; those of Year six were significantly greater than those of Year 2, p = .003; those of Office was significantly greater than those of Year 2, p < .001; those of Year 4 were significantly greater than those of Year 2, p = .005; those of Year 6 were significantly greater than those of Dining hall, p = .006; those of Office was significantly greater than those of Dining hall, p < .001; those of Year 4 were significantly greater than those of Dining hall, p < .001; those of Office was significantly greater than those of Year 3, p = .016; and those of Year 4 were significantly greater than those of Year 3, p < .001; and those of Kitchen, p = .007. Only statistically significant results are reported.

Table S9:Formaldehyde Pairwise Comparisons between Location

| Sample 1- Sample 2 | Test Statistic | Std. Error | Std. Test Statistic | Sig. | Adj. Sig.a |
| --- | --- | --- | --- | --- | --- |
| Year 2-Dinning Hall | 4.073 | 26.34 | 0.16 | 0.877 | 1 |
| Year 2-Year 3 | -32.583 | 26.34 | -1.24 | 0.216 | 1 |
| Year 2-Kitchen | 54.906 | 26.34 | 2.09 | 0.037 | 1 |
| Year 2-Reception Class | 85 | 26.34 | 3.23 | 0.001 | 0.056 |
| Year 2-Year 1 | 87.74 | 26.34 | 3.33 | <.001 | 0.039 |
| Year 2-Year 5 | -98.604 | 26.34 | -3.74 | <.001 | 0.008 |
| Year 2-Year 6 | 104.24 | 26.34 | 3.96 | <.001 | 0.003 |
| Year 2-Office | 126.802 | 26.34 | 4.82 | <.001 | 0 |
| Year 2-Year 4 | -154.281 | 26.34 | -5.86 | <.001 | 0 |
| Dining Hall-Year 3 | -28.51 | 26.34 | -1.08 | 0.279 | 1 |
| Dining Hall-Kitchen | -50.833 | 26.34 | -1.93 | 0.054 | 1 |
| Dining Hall-Reception Class | -80.927 | 26.34 | -3.07 | 0.002 | 0.095 |
| Dining Hall-Year 1 | -83.667 | 26.34 | -3.18 | 0.001 | 0.067 |
| Dining Hall-Year 5 | -94.531 | 26.34 | -3.59 | <.001 | 0.015 |
| Dining Hall-Year 6 | 100.167 | 26.34 | 3.80 | <.001 | 0.006 |
| Dining Hall-Office | 122.729 | 26.34 | 4.66 | <.001 | 0 |
| Dining Hall-Year 4 | -150.208 | 26.34 | -5.70 | <.001 | 0 |
| Year 3-Kitchen | 22.323 | 26.34 | 0.85 | 0.397 | 1 |
| Year 3-Reception Class | 52.417 | 26.34 | 1.99 | 0.047 | 1 |
| Year 3-Year 1 | 55.156 | 26.34 | 2.09 | 0.036 | 1 |
| Year 3-Year 5 | -66.021 | 26.34 | -2.51 | 0.012 | 0.548 |
| Year 3-Year 6 | 71.656 | 26.34 | 2.72 | 0.007 | 0.293 |
| Year 3-Office | 94.219 | 26.34 | 3.58 | <.001 | 0.016 |
| Year 3-Year 4 | -121.698 | 26.34 | -4.62 | <.001 | 0 |
| Kitchen-Reception Class | -30.094 | 26.34 | -1.14 | 0.253 | 1 |
| Kitchen-Year 1 | -32.833 | 26.34 | -1.25 | 0.212 | 1 |
| Kitchen-Year 5 | -43.698 | 26.34 | -1.66 | 0.097 | 1 |
| Kitchen-Year 6 | 49.333 | 26.34 | 1.87 | 0.061 | 1 |
| Kitchen-Office | 71.896 | 26.34 | 2.73 | 0.006 | 0.285 |
| Kitchen-Year 4 | -99.375 | 26.34 | -3.77 | <.001 | 0.007 |
| Reception Class-Year 1 | -2.74 | 26.34 | -0.10 | 0.917 | 1 |
| Reception Class-Year 5 | -13.604 | 26.34 | -0.52 | 0.605 | 1 |
| Reception Class-Year 6 | 19.24 | 26.34 | 0.73 | 0.465 | 1 |
| Reception Class-Office | 41.802 | 26.34 | 1.59 | 0.112 | 1 |
| Reception Class-Year 4 | -69.281 | 26.34 | -2.63 | 0.009 | 0.383 |
| Year 1-Year 5 | -10.865 | 26.34 | -0.41 | 0.68 | 1 |
| Year 1-Year 6 | 16.5 | 26.34 | 0.63 | 0.531 | 1 |
| Year 1-Office | 39.063 | 26.34 | 1.48 | 0.138 | 1 |
| Year 1-Year 4 | -66.542 | 26.34 | -2.53 | 0.012 | 0.518 |
| Year 5-Year 6 | 5.635 | 26.34 | 0.21 | 0.831 | 1 |
| Year 5-Office | 28.198 | 26.34 | 1.07 | 0.284 | 1 |
| Year 5-Year 4 | 55.677 | 26.34 | 2.11 | 0.035 | 1 |
| Year 6-Office | 22.563 | 26.34 | 0.86 | 0.392 | 1 |
| Year 6-Year 4 | -50.042 | 26.34 | -1.90 | 0.057 | 1 |
| Office-Year 4 | -27.479 | 26.34 | -1.04 | 0.297 | 1 |

Each row tests the null hypothesis that the Sample 1 and Sample 2 distributions are the same.

Asymptotic significances (2-sided tests) are displayed. The significance level is .050.

1. Significance values have been adjusted by the Bonferroni correction for multiple tests.
